# Supplementary material for: miR-514a-3p: a novel SHP-2 regulatory miRNA that modulates human cytotrophoblast proliferation
Source: PubMed Central journal article supplement (PMC8789026; doi:10.1530/jme-21-0175), 2021-11-18
Supplement: supplementary_table_1.pdf [file supplementary_table_1.pdf]

**Supplementary Table 1. Demographic of term placental tissue**

|                                                    | Term placental tissue (n=8)                                  |
|----------------------------------------------------|--------------------------------------------------------------|
| <b>Age</b><br>(years)                              | 31.5 (22 – 38)                                               |
| <b>Ethnicity</b><br>Caucasian: Other<br>Number (%) | 5:3<br>(62.5%:37.5%)                                         |
| <b>Smoker</b><br>Number (%)                        | 2 (25%)                                                      |
| <b>BMI at booking</b><br>Kg/m <sup>2</sup>         | 26.0<br>(22.5 – 34.2)                                        |
| <b>Gestation at delivery</b><br>(days)             | 272<br>(262 – 284)                                           |
| <b>Birthweight</b><br>(g)                          | 3560<br>(3094 – 4640)                                        |
| <b>Fetal Sex</b>                                   | Male: 4 (50%)<br>Female 4 (50%)                              |
| <b>IBC</b>                                         | 45.5<br>(24 – 81)                                            |
| <b>Parity</b>                                      | 1.63<br>(1-4)                                                |
| <b>Mode of delivery</b>                            | Normal vaginal delivery: 5 (62.5%)<br>Elective CS: 3 (37.5%) |

BMI, body mass index; FGR, fetal growth restriction; IBC, individualised birthweight centile; CS Caesarean section
