# Supplementary material for: miR-514a-3p: a novel SHP-2 regulatory miRNA that modulates human cytotrophoblast proliferation
Source: PubMed Central journal article supplement (PMC8789026; doi:10.1530/jme-21-0175), 2021-11-18
Supplement: supplementary_table_2.pdf [file supplementary_table_2.pdf]

| miRNA ID         | miRabel score | PITA | miRanda | SVMicro | Target Scan | Experimentally validated (ExpVal) | binding site in 5'UTR | binding site in coding region (CDS) |
|------------------|---------------|------|---------|---------|-------------|-----------------------------------|-----------------------|-------------------------------------|
| hsa-miR-450b-3p  | 0.00132043    | 617  | 99      | 1260    | 586         | NO                                | NO                    | YES                                 |
| hsa-miR-378a-3p  | 0.00143759    | 207  | 776     | 1311    | 138         | NO                                | NO                    | NO                                  |
| hsa-miR-934      | 0.00226988    | 305  | 298     | 1134    | 447         | NO                                | NO                    | NO                                  |
| hsa-miR-1304-5p  | 0.00310759    | 243  | 179     | 3836    | 141         | NO                                | NO                    | NO                                  |
| hsa-miR-1305     | 0.00427742    | 395  | 1363    | 1836    | 1842        | NO                                | NO                    | NO                                  |
| hsa-miR-522-3p   | 0.00429541    | 312  | 585     | 2731    | 749         | NO                                | NO                    | NO                                  |
| hsa-miR-208b-3p  | 0.00468538    | 253  | 1979    | 242     | 603         | NO                                | NO                    | NO                                  |
| hsa-miR-1205     | 0.00483143    | 624  | 137     | 4757    | 311         | NO                                | NO                    | NO                                  |
| hsa-miR-217      | 0.00504804    | 299  | 3185    | 150     | 1574        | NO                                | NO                    | YES                                 |
| hsa-miR-186-5p   | 0.00511912    | 1931 | 1960    | 1328    | 1692        | NO                                | NO                    | NO                                  |
| hsa-miR-509-5p   | 0.00530646    | 547  | 332     | 1798    | 2813        | NO                                | NO                    | NO                                  |
| hsa-miR-208a-3p  | 0.00537874    | 532  | 1980    | 136     | 588         | NO                                | NO                    | NO                                  |
| hsa-miR-509-3-5p | 0.00607859    | 793  | 328     | 1800    | 2849        | NO                                | NO                    | NO                                  |
| hsa-miR-1272     | 0.00626628    | 1260 | 1432    | 675     | 1495        | NO                                | NO                    | YES                                 |
| hsa-miR-1228-3p  | 0.0075711     | 328  | 1885    | 433     | 2487        | NO                                | YES                   | NO                                  |
| hsa-miR-561-3p   | 0.00780227    | 220  | 3415    | 1201    | 1304        | NO                                | NO                    | NO                                  |
| hsa-miR-124-3p   | 0.00811489    | 1185 | 1919    | 2974    | 819         | YES                               | NO                    | NO                                  |
| hsa-miR-873-5p   | 0.00821033    | 1215 | 2137    | 4115    | 394         | NO                                | NO                    | NO                                  |
| hsa-miR-581      | 0.00855142    | 86   | 1701    | 1991    | 1756        | NO                                | NO                    | NO                                  |
| hsa-miR-143-3p   | 0.00883897    | 3202 | 893     | 2085    | 739         | NO                                | NO                    | NO                                  |
| hsa-miR-335-5p   | 0.00921739    | 406  | 2642    | 1232    | 2079        | NO                                | NO                    | NO                                  |
| hsa-miR-582-5p   | 0.00989024    | 774  | 1390    | 2867    | 1019        | NO                                | NO                    | NO                                  |
| hsa-miR-409-3p   | 0.0104121     | 640  | 503     | 2734    | 2757        | NO                                | NO                    | YES                                 |
| hsa-miR-545-3p   | 0.010688      | 1509 | 533     | 3280    | 1047        | NO                                | NO                    | NO                                  |
| hsa-miR-374b-5p  | 0.0107144     | 710  | 1788    | 1929    | 2118        | NO                                | NO                    | NO                                  |
| hsa-miR-758-3p   | 0.0109835     | 703  | 1457    | 2494    | 1043        | NO                                | NO                    | NO                                  |
| hsa-miR-655-3p   | 0.0113064     | 2092 | 1295    | 1470    | 1183        | NO                                | NO                    | YES                                 |
| hsa-miR-216b-5p  | 0.0115288     | 738  | 1577    | 2809    | 1075        | NO                                | NO                    | NO                                  |
| hsa-miR-1288-3p  | 0.0115885     | 141  | 2425    | 2838    | 657         | NO                                | NO                    | YES                                 |
| hsa-miR-129-5p   | 0.0120618     | 96   | 3116    | 4264    | 1279        | NO                                | NO                    | NO                                  |
| hsa-miR-657      | 0.0122207     | 1432 | 1210    | 3162    | 1383        | NO                                | NO                    | YES                                 |
| hsa-miR-892b     | 0.0124408     | 666  | 1988    | 2140    | 1088        | NO                                | YES                   | NO                                  |
| hsa-miR-505-3p   | 0.01304       | 547  | 1443    | 1662    | 1473        | NO                                | NO                    | NO                                  |
| hsa-miR-362-3p   | 0.0136861     | 1873 | 3069    | 820     | 680         | NO                                | NO                    | NO                                  |
| hsa-miR-138-5p   | 0.013946      | 2741 | 683     | 3660    | 343         | NO                                | NO                    | YES                                 |
| hsa-miR-891b     | 0.0152735     | 294  | 2870    | 897     | 1427        | NO                                | NO                    | NO                                  |
| hsa-miR-298      | 0.016545201   | 804  | 574     | 4229    | 3388        | NO                                | NO                    | YES                                 |
| hsa-miR-362-5p   | 0.016837601   | 3271 | 407     | 671     | 1607        | NO                                | NO                    | NO                                  |
| hsa-miR-1286     | 0.0168918     | 2981 | 2037    | 2032    | 1359        | NO                                | NO                    | YES                                 |
| hsa-miR-548p     | 0.0170797     | 1081 | 4468    | 1715    | 1711        | NO                                | NO                    | NO                                  |

|                  |             |      |      |      |      |     |     |     |
|------------------|-------------|------|------|------|------|-----|-----|-----|
| hsa-miR-636      | 0.017554101 | 646  | 2063 | 2735 | 1633 | NO  | YES | NO  |
| hsa-miR-1245a    | 0.017710401 | 362  | 2237 | 2678 | 1383 | NO  | NO  | NO  |
| hsa-miR-510-5p   | 0.018373899 | 3674 | 158  | 3363 | 887  | NO  | NO  | YES |
| hsa-miR-558      | 0.0188428   | 1437 | 1386 | 2726 | 2674 | NO  | NO  | NO  |
| hsa-miR-1243     | 0.0195345   | 2322 | 1167 | 1959 | 1830 | NO  | NO  | NO  |
| hsa-miR-338-5p   | 0.020249    | 1745 | 2669 | 444  | 2592 | NO  | NO  | YES |
| hsa-miR-599      | 0.020559501 | 526  | 5105 | 1554 | 860  | NO  | NO  | NO  |
| hsa-miR-501-5p   | 0.0214845   | 1493 | 2727 | 1959 | 1764 | NO  | YES | NO  |
| hsa-miR-23a-3p   | 0.0234324   | 1691 | 1923 | 3165 | 1949 | YES | NO  | NO  |
| hsa-miR-28-3p    | 0.023442    | 874  | 2676 | 1775 | 728  | NO  | NO  | YES |
| hsa-miR-223-3p   | 0.023655999 | 24   | 4470 | 906  | 1948 | NO  | NO  | NO  |
| hsa-miR-498      | 0.024004901 | 269  | 3696 | 3295 | 1955 | NO  | NO  | YES |
| hsa-miR-374a-5p  | 0.024374099 | 2134 | 2002 | 2308 | 1959 | NO  | NO  | NO  |
| hsa-miR-548b-5p  | 0.024625201 | 1484 | 4962 | 1835 | 1723 | NO  | NO  | YES |
| hsa-miR-383-5p   | 0.0267397   | 2521 | 1030 | 1766 | 2681 | NO  | NO  | NO  |
| hsa-miR-653-5p   | 0.0268798   | 1038 | 3764 | 2263 | 2149 | NO  | NO  | NO  |
| hsa-miR-485-5p   | 0.026946301 | 436  | 4293 | 4837 | 897  | NO  | YES | NO  |
| hsa-miR-99a-5p   | 0.028137    | 617  | 863  | 530  | 188  | NO  | NO  | NO  |
| hsa-miR-921      | 0.028470799 | 699  | 2657 | 2063 | 465  | NO  | NO  | YES |
| hsa-miR-218-5p   | 0.0285636   | 1298 | 3805 | 2020 | 1639 | YES | NO  | NO  |
| hsa-miR-556-3p   | 0.028608499 | 2381 | 1497 | 1201 | 1435 | NO  | NO  | NO  |
| hsa-miR-942-5p   | 0.029321801 | 1140 | 6295 | 439  | 583  | YES | NO  | YES |
| hsa-miR-628-5p   | 0.0306086   | 2227 | 173  | 2071 | 2222 | NO  | NO  | NO  |
| hsa-miR-578      | 0.031941801 | 1047 | 6116 | 409  | 2857 | NO  | NO  | YES |
| hsa-miR-99b-5p   | 0.0325846   | 730  | 821  | 541  | 205  | NO  | NO  | NO  |
| hsa-miR-183-5p   | 0.033430401 | 2962 | 2931 | 356  | 3382 | YES | NO  | NO  |
| hsa-miR-1266-5p  | 0.033883899 | 79   | 3559 | 4885 | 2544 | NO  | NO  | YES |
| hsa-miR-1275     | 0.035075501 | 766  | 5248 | 2260 | 2533 | NO  | NO  | NO  |
| hsa-miR-345-5p   | 0.036424499 | 536  | 2612 | 750  | 1855 | NO  | NO  | YES |
| hsa-miR-185-5p   | 0.038206    | 3891 | 2968 | 2783 | 2254 | NO  | NO  | YES |
| hsa-miR-1255a    | 0.038934398 | 1260 | 3579 | 2002 | 1936 | NO  | NO  | NO  |
| hsa-miR-554      | 0.038995601 | 1666 | 1794 | 1884 | 630  | NO  | NO  | NO  |
| hsa-miR-620      | 0.039069802 | 2085 | 5853 | 196  | 2058 | NO  | NO  | NO  |
| hsa-miR-23b-3p   | 0.042318702 | 3032 | 1915 | 3338 | 1934 | NO  | NO  | YES |
| hsa-miR-548i     | 0.043246102 | 3123 | 4798 | 1891 | 1822 | NO  | NO  | NO  |
| hsa-miR-621      | 0.0448272   | 1482 | 1451 | 2500 | 1029 | NO  | NO  | NO  |
| hsa-miR-1255b-5p | 0.048762999 | 1516 | 3503 | 2300 | 1959 | NO  | NO  | NO  |
| hsa-miR-187-3p   | 0.0488129   | 1771 | 1172 | 1195 | 544  | NO  | NO  | NO  |
| hsa-miR-9-5p     | 0.053849    | 1954 | 6229 | 958  | 2904 | NO  | NO  | YES |
| hsa-miR-200b-3p  | 0.053858001 | 1781 | 3922 | 2480 | 1208 | NO  | NO  | NO  |
| hsa-miR-1321     | 0.053941999 | 1555 | 4512 | 5333 | 1759 | NO  | NO  | YES |
| hsa-miR-377-3p   | 0.054179501 | 1108 | 6533 | 705  | 1863 | NO  | NO  | NO  |
| hsa-miR-301a-3p  | 0.055060498 | 1802 | 4069 | 2553 | 2259 | NO  | NO  | NO  |

|                 |             |      |      |      |      |     |     |     |
|-----------------|-------------|------|------|------|------|-----|-----|-----|
| hsa-miR-1208    | 0.057885401 | 158  | 6809 | 1878 | 2616 | NO  | NO  | NO  |
| hsa-miR-548m    | 0.0599805   | 1701 | 4103 | 3606 | 2337 | NO  | NO  | NO  |
| hsa-miR-548a-5p | 0.060578    | 1946 | 4835 | 4085 | 1795 | NO  | NO  | NO  |
| hsa-miR-422a    | 0.061023701 | 8    | 789  | -    | 138  | NO  | NO  | NO  |
| hsa-miR-559     | 0.061084401 | 3904 | 4599 | 2456 | 1609 | NO  | NO  | NO  |
| hsa-miR-130a-3p | 0.061291799 | 1924 | 3951 | 2834 | 2244 | NO  | NO  | NO  |
| hsa-miR-130b-3p | 0.0615515   | 1584 | 3951 | 3198 | 2286 | NO  | NO  | NO  |
| hsa-miR-920     | 0.062229499 | 2678 | 2421 | 4256 | 1967 | NO  | NO  | NO  |
| hsa-miR-1270    | 0.062916301 | 2506 | 5935 | 1084 | 2354 | NO  | NO  | YES |
| hsa-miR-1291    | 0.063492902 | 103  | 3815 | 4227 | 2752 | NO  | NO  | YES |
| hsa-miR-496     | 0.063863002 | 2353 | 3607 | 1613 | 2200 | NO  | NO  | NO  |
| hsa-miR-511-5p  | 0.064907998 | 2641 | 4865 | 3552 | 1629 | NO  | NO  | YES |
| hsa-miR-548d-3p | 0.067662902 | 2381 | 4987 | 3869 | 1391 | YES | NO  | NO  |
| hsa-miR-365a-3p | 0.069891401 | 690  | 4725 | 1143 | 1616 | NO  | NO  | YES |
| hsa-miR-663b    | 0.072725303 | 3255 | 2968 | 1617 | 2394 | NO  | YES | NO  |
| hsa-miR-146b-3p | 0.0734917   | 2415 | 3173 | 4341 | 1773 | NO  | YES | NO  |
| hsa-miR-548c-5p | 0.075328603 | 2306 | 4743 | 4673 | 1699 | NO  | NO  | NO  |
| hsa-miR-105-5p  | 0.078042597 | 513  | 744  | -    | 682  | NO  | NO  | NO  |
| hsa-miR-1827    | 0.078763902 | 2298 | 6866 | 3076 | 2644 | NO  | NO  | NO  |
| hsa-miR-328-3p  | 0.080290698 | 964  | 4064 | 3521 | 2352 | NO  | NO  | NO  |
| hsa-miR-640     | 0.082244098 | 2301 | 4400 | 1583 | 1160 | NO  | NO  | NO  |
| hsa-miR-1296-5p | 0.082397602 | 3496 | 3335 | 981  | 1178 | NO  | YES | NO  |
| hsa-miR-583     | 0.0830248   | 3564 | 3232 | 4516 | 2641 | NO  | NO  | NO  |
| hsa-miR-152-3p  | 0.083462998 | 1797 | 3370 | 4223 | 2488 | NO  | NO  | YES |
| hsa-miR-495-3p  | 0.084692702 | 1361 | 7947 | 102  | 2679 | NO  | NO  | YES |
| hsa-miR-1252-5p | 0.084729202 | 226  | 1516 | 5087 | 1006 | NO  | NO  | NO  |
| hsa-miR-515-5p  | 0.086231001 | 264  | 8239 | 3741 | 1738 | NO  | NO  | NO  |
| hsa-miR-342-5p  | 0.0870739   | 1176 | 5038 | 1399 | 3077 | NO  | NO  | NO  |
| hsa-miR-618     | 0.0909326   | 1123 | 5356 | 1988 | 2325 | NO  | NO  | YES |
| hsa-miR-330-3p  | 0.091440499 | 3856 | 3381 | 3117 | 3067 | NO  | NO  | YES |
| hsa-miR-548j-5p | 0.0981775   | 3583 | 4723 | 4301 | 1675 | NO  | NO  | NO  |
| hsa-miR-194-5p  | 0.101057    | 3237 | 4922 | 170  | 2205 | NO  | NO  | NO  |
| hsa-miR-548b-3p | 0.102003001 | 2209 | 3492 | 2046 | 1267 | NO  | NO  | NO  |
| hsa-miR-1287-5p | 0.104130998 | 3256 | 5173 | 3052 | 2357 | NO  | NO  | NO  |
| hsa-miR-134-5p  | 0.104172997 | 3426 | 4772 | 1014 | 1681 | NO  | NO  | NO  |
| hsa-miR-524-5p  | 0.105801001 | 1333 | 6778 | 4603 | 1985 | NO  | NO  | NO  |
| hsa-miR-200c-3p | 0.106614999 | 2964 | 3945 | 2904 | 1520 | NO  | NO  | NO  |
| hsa-miR-1229-3p | 0.106948003 | 2583 | 4101 | 3178 | 2534 | NO  | NO  | NO  |
| hsa-miR-1293    | 0.108906001 | 989  | 5852 | 4950 | 2945 | NO  | NO  | YES |
| hsa-miR-1299    | 0.109182    | 3801 | 5826 | 3914 | 1637 | NO  | NO  | YES |
| hsa-miR-500a-5p | 0.112999    | 34   | 1200 | 1536 | -    | NO  | NO  | YES |
| hsa-miR-548d-5p | 0.113309003 | 3605 | 4956 | 4724 | 1711 | NO  | NO  | NO  |
| hsa-miR-132-3p  | 0.117353    | 3001 | 4373 | 23   | 2175 | NO  | NO  | NO  |

|                  |             |      |      |       |      |     |     |     |
|------------------|-------------|------|------|-------|------|-----|-----|-----|
| hsa-miR-548c-3p  | 0.117416002 | 4331 | 7993 | 2895  | 2113 | NO  | NO  | NO  |
| hsa-miR-224-5p   | 0.118683003 | 424  | 2792 | 38    | -    | NO  | NO  | NO  |
| hsa-miR-605-5p   | 0.118860997 | 1084 | 1191 | -     | 583  | NO  | NO  | YES |
| hsa-miR-212-3p   | 0.119539    | 1915 | 4291 | 1120  | 2179 | NO  | NO  | NO  |
| hsa-miR-548k     | 0.121051997 | 158  | 7494 | 4091  | 2223 | NO  | NO  | NO  |
| hsa-miR-147a     | 0.121389002 | 947  | 4791 | 3414  | 2022 | NO  | NO  | NO  |
| hsa-miR-412-3p   | 0.125375003 | 24   | 1606 | -     | 1423 | NO  | NO  | YES |
| hsa-miR-651-5p   | 0.127456993 | 331  | 1678 | 4970  | 1146 | NO  | NO  | NO  |
| hsa-miR-654-3p   | 0.130322993 | 3143 | 5115 | 2207  | 1853 | NO  | NO  | YES |
| hsa-miR-542-3p   | 0.130364999 | 2512 | 5844 | 2661  | 1989 | NO  | NO  | NO  |
| hsa-miR-582-3p   | 0.132262006 | 2328 | 527  | 2759  | 237  | NO  | NO  | NO  |
| hsa-miR-369-3p   | 0.133454993 | 2961 | 4584 | 2858  | 2060 | NO  | NO  | NO  |
| hsa-miR-421      | 0.134507    | 12   | 1055 | -     | 2240 | NO  | NO  | NO  |
| hsa-miR-527      | 0.137979999 | 1401 | 922  | -     | 1517 | NO  | NO  | NO  |
| hsa-miR-518a-5p  | 0.137979999 | 1401 | 922  | -     | 1517 | NO  | NO  | NO  |
| hsa-miR-769-3p   | 0.141161993 | 2883 | 92   | -     | 534  | NO  | NO  | YES |
| hsa-miR-26b-3p   | 0.141249001 | -    | 1082 | 2005  | 259  | NO  | YES | NO  |
| hsa-miR-520h     | 0.145468995 | 2054 | 7186 | 1474  | 3606 | NO  | NO  | NO  |
| hsa-miR-944      | 0.145849004 | 76   | 3071 | -     | 1321 | NO  | NO  | NO  |
| hsa-miR-381-3p   | 0.148448005 | 3676 | 5098 | 1443  | 2692 | NO  | NO  | NO  |
| hsa-miR-136-5p   | 0.151206002 | 1794 | 6690 | 3336  | 2556 | NO  | NO  | YES |
| hsa-miR-520g-3p  | 0.151559994 | 2495 | 7249 | 1242  | 3612 | NO  | NO  | NO  |
| hsa-miR-10b-3p   | 0.153538004 | -    | 691  | 373   | 2343 | NO  | NO  | NO  |
| hsa-miR-24-3p    | 0.155282006 | 581  | 3016 | 13995 | 1355 | NO  | NO  | NO  |
| hsa-miR-146b-5p  | 0.156370997 | 2315 | 5477 | 3093  | 2526 | NO  | NO  | NO  |
| hsa-miR-548g-3p  | 0.157389998 | 532  | 2112 | -     | 1765 | NO  | NO  | NO  |
| hsa-miR-196a-5p  | 0.158451006 | 1634 | 1156 | -     | 742  | NO  | NO  | NO  |
| hsa-miR-151a-3p  | 0.159679994 | 2420 | 2741 | 1601  | 1805 | NO  | YES | NO  |
| hsa-miR-431-3p   | 0.161952004 | -    | 148  | 1018  | 10   | NO  | NO  | NO  |
| hsa-miR-361-3p   | 0.162396997 | 2260 | 5439 | 4413  | 1677 | NO  | NO  | NO  |
| hsa-miR-29b-2-5p | 0.163338006 | -    | 676  | 741   | 2822 | NO  | NO  | YES |
| hsa-miR-635      | 0.164086998 | 3028 | 2821 | 2796  | 2753 | NO  | NO  | NO  |
| hsa-miR-376b-3p  | 0.165677994 | 208  | 2578 | 2808  | 968  | NO  | NO  | NO  |
| hsa-miR-645      | 0.170214996 | 4585 | 3437 | 2072  | 1477 | NO  | NO  | YES |
| hsa-miR-1184     | 0.170966998 | 670  | 3657 | 1058  | -    | NO  | NO  | YES |
| hsa-miR-302d-3p  | 0.171752006 | 4035 | 5527 | 3144  | 2377 | NO  | NO  | NO  |
| hsa-miR-499a-5p  | 0.176079005 | 426  | 1069 | 1972  | -    | NO  | NO  | NO  |
| hsa-miR-489-3p   | 0.177898005 | 2287 | 980  | 3540  | 778  | YES | NO  | NO  |
| hsa-let-7f-2-3p  | 0.178652003 | -    | 1794 | 819   | 1544 | NO  | NO  | NO  |
| hsa-miR-188-3p   | 0.180641994 | 4339 | 5068 | 3111  | 2044 | NO  | NO  | YES |
| hsa-miR-1273a    | 0.182116002 | 808  | 1117 | 2063  | 418  | NO  | NO  | NO  |
| hsa-miR-1256     | 0.182240993 | 2862 | 5169 | 3098  | 1584 | NO  | NO  | YES |
| hsa-miR-202-5p   | 0.183076993 | -    | 924  | 1783  | 376  | NO  | NO  | NO  |

|                  |             |      |      |       |      |    |     |     |
|------------------|-------------|------|------|-------|------|----|-----|-----|
| hsa-miR-1276     | 0.183534995 | 1696 | 89   | 3542  | -    | NO | NO  | NO  |
| hsa-miR-135b-3p  | 0.184383005 | -    | 468  | 1548  | 796  | NO | NO  | YES |
| hsa-miR-1233-3p  | 0.187611997 | 3032 | 5779 | 2646  | 2170 | NO | YES | NO  |
| hsa-miR-138-2-3p | 0.188162997 | -    | 1420 | 2946  | 195  | NO | NO  | YES |
| hsa-miR-146a-5p  | 0.190625995 | 3200 | 5519 | 3004  | 2531 | NO | NO  | NO  |
| hsa-miR-374a-3p  | 0.192799002 | -    | 2745 | 301   | 878  | NO | NO  | NO  |
| hsa-miR-516a-3p  | 0.194117993 | 3933 | 631  | -     | 382  | NO | NO  | YES |
| hsa-miR-337-5p   | 0.200278997 | 1215 | 597  | 6579  | 242  | NO | NO  | NO  |
| hsa-miR-589-5p   | 0.200913996 | 1610 | 1612 | -     | 1034 | NO | NO  | NO  |
| hsa-miR-7-2-3p   | 0.203990996 | -    | 2814 | 523   | 3027 | NO | NO  | NO  |
| hsa-miR-601      | 0.205153003 | 1751 | 252  | -     | 1104 | NO | NO  | NO  |
| hsa-miR-196b-5p  | 0.206462994 | 2553 | 1073 | -     | 745  | NO | NO  | NO  |
| hsa-miR-1246     | 0.208223999 | 4379 | 4822 | 2229  | 1318 | NO | NO  | NO  |
| hsa-miR-376a-3p  | 0.208574995 | 964  | 2500 | -     | 961  | NO | NO  | NO  |
| hsa-miR-556-5p   | 0.211430997 | 376  | 3003 | 7444  | 934  | NO | NO  | NO  |
| hsa-miR-7-1-3p   | 0.217892006 | -    | 2921 | 795   | 3008 | NO | NO  | NO  |
| hsa-miR-194-3p   | 0.218291    | -    | 962  | 1618  | 2968 | NO | NO  | NO  |
| hsa-miR-512-3p   | 0.221820995 | 2642 | 1056 | 7234  | 2078 | NO | NO  | NO  |
| hsa-miR-329-3p   | 0.223376006 | 1190 | 2929 | 3821  | 887  | NO | NO  | YES |
| hsa-miR-1265     | 0.224294007 | 1422 | 3251 | -     | 871  | NO | NO  | NO  |
| hsa-miR-1260a    | 0.231847003 | 3980 | 1048 | -     | 395  | NO | NO  | YES |
| hsa-miR-448      | 0.236009002 | 1055 | 2441 | -     | 1396 | NO | NO  | NO  |
| hsa-miR-455-5p   | 0.238929003 | 2884 | 992  | -     | 487  | NO | NO  | NO  |
| hsa-miR-1227-3p  | 0.243159994 | 376  | 3027 | 3297  | 1946 | NO | NO  | NO  |
| hsa-miR-603      | 0.245607004 | 1564 | 1366 | -     | 2437 | NO | NO  | NO  |
| hsa-miR-608      | 0.247343004 | 535  | 3021 | -     | 2002 | NO | NO  | YES |
| hsa-miR-568      | 0.248677999 | 3246 | 1220 | 10201 | 1137 | NO | NO  | NO  |
| hsa-miR-323b-5p  | 0.251365006 | 3727 | 4042 | 2608  | 1623 | NO | NO  | YES |
| hsa-miR-186-3p   | 0.252754003 | -    | 3802 | 1927  | 865  | NO | NO  | NO  |
| hsa-miR-410-3p   | 0.256489009 | 569  | 4546 | 748   | -    | NO | NO  | NO  |
| hsa-miR-181c-3p  | 0.258332998 | -    | 2257 | 1111  | 565  | NO | NO  | YES |
| hsa-miR-885-5p   | 0.264512002 | 466  | 2722 | -     | 1356 | NO | NO  | YES |
| hsa-miR-200a-5p  | 0.266595006 | -    | 1767 | 1146  | 1417 | NO | NO  | NO  |
| hsa-miR-659-3p   | 0.273077011 | 913  | 2847 | 2642  | -    | NO | NO  | NO  |
| hsa-miR-1825     | 0.28579399  | 3399 | 2005 | 3594  | 977  | NO | NO  | YES |
| hsa-miR-211-5p   | 0.286529005 | 5505 | 5516 | 3758  | 2917 | NO | NO  | YES |
| hsa-miR-650      | 0.28966701  | 5292 | 6777 | 4917  | 3143 | NO | NO  | YES |
| hsa-miR-569      | 0.290315986 | 1833 | 1847 | 3402  | 1675 | NO | NO  | NO  |
| hsa-miR-494-3p   | 0.290610999 | 5892 | 5432 | 4748  | 3056 | NO | NO  | NO  |
| hsa-miR-616-3p   | 0.293623    | 3082 | 2094 | 4358  | 858  | NO | NO  | NO  |
| hsa-miR-301b     | 0.30015099  | 658  | 4054 | 3776  | 2259 | NO | NO  | NO  |
| hsa-miR-301b-3p  | 0.30015099  | 658  | 4054 | 3776  | 2259 | NO | NO  | NO  |
| hsa-miR-506-3p   | 0.301862001 | 1868 | 1884 | 3914  | -    | NO | NO  | NO  |

|                  |             |      |      |       |      |    |     |     |
|------------------|-------------|------|------|-------|------|----|-----|-----|
| hsa-miR-1226-3p  | 0.304044992 | 2658 | 2606 | 4910  | 1474 | NO | NO  | YES |
| hsa-miR-656-3p   | 0.304944009 | 1723 | 3782 | 4577  | 1475 | NO | NO  | NO  |
| hsa-miR-513b-5p  | 0.306062013 | 560  | 3803 | 4368  | 2499 | NO | NO  | YES |
| hsa-miR-637      | 0.310636014 | 2855 | 8294 | 4878  | 3705 | NO | YES | NO  |
| hsa-miR-15a-3p   | 0.316477001 | -    | 3300 | 2374  | 1259 | NO | YES | NO  |
| hsa-miR-491-5p   | 0.318204999 | 3395 | 1740 | 4864  | 2894 | NO | YES | NO  |
| hsa-miR-182-5p   | 0.318495005 | 3105 | 1525 | 2643  | -    | NO | NO  | NO  |
| hsa-miR-610      | 0.318747997 | 1203 | 2230 | -     | 778  | NO | NO  | NO  |
| hsa-miR-150-3p   | 0.31942901  | -    | 653  | 3124  | 1016 | NO | NO  | NO  |
| hsa-miR-892a     | 0.323642999 | 293  | 3535 | 651   | -    | NO | NO  | NO  |
| hsa-miR-203a     | 0.327226996 | 4226 | 7392 | 3448  | 3763 | NO | NO  | NO  |
| hsa-miR-203a-3p  | 0.327226996 | 4226 | 7392 | 3448  | 3763 | NO | NO  | NO  |
| hsa-miR-769-5p   | 0.328711987 | 1399 | 2860 | -     | 1889 | NO | NO  | NO  |
| hsa-miR-454-3p   | 0.335336    | 4066 | 980  | -     | 2303 | NO | NO  | NO  |
| hsa-miR-371a-5p  | 0.33723101  | 5773 | 504  | 4939  | 1971 | NO | NO  | NO  |
| hsa-miR-218-1-3p | 0.343681008 | -    | 1922 | 2637  | 877  | NO | NO  | YES |
| hsa-miR-548f-3p  | 0.34453401  | 2281 | 2362 | -     | 3487 | NO | NO  | NO  |
| hsa-miR-591      | 0.345761001 | 631  | 3205 | -     | 912  | NO | NO  | YES |
| hsa-miR-95-3p    | 0.346524    | 1568 | 521  | -     | 288  | NO | NO  | NO  |
| hsa-miR-200b-5p  | 0.347662985 | -    | 1920 | 1690  | 1776 | NO | NO  | NO  |
| hsa-miR-429      | 0.350255013 | 1502 | 4013 | -     | 1205 | NO | NO  | YES |
| hsa-miR-660-5p   | 0.350504994 | 1311 | 2620 | 2780  | 1389 | NO | NO  | NO  |
| hsa-miR-30c-1-3p | 0.351233006 | -    | 3410 | 2446  | 2899 | NO | NO  | YES |
| hsa-miR-378a-5p  | 0.353208989 | -    | 2598 | 4124  | 1060 | NO | NO  | NO  |
| hsa-miR-222-3p   | 0.353707999 | 212  | 3833 | 1976  | -    | NO | NO  | YES |
| hsa-miR-486-3p   | 0.356628001 | 4125 | 1009 | 16892 | 2190 | NO | NO  | NO  |
| hsa-miR-187-5p   | 0.358808994 | -    | 1409 | 2121  | 1865 | NO | NO  | NO  |
| hsa-let-7a-3p    | 0.361041009 | -    | 2908 | 1956  | 2278 | NO | NO  | NO  |
| hsa-miR-100-5p   | 0.362060994 | 735  | 863  | -     | 200  | NO | NO  | NO  |
| hsa-miR-1237-3p  | 0.364331007 | 4625 | 7562 | 4609  | 3434 | NO | NO  | NO  |
| hsa-let-7b-3p    | 0.366136014 | -    | 2668 | 2184  | 2221 | NO | NO  | NO  |
| hsa-miR-488-3p   | 0.368782014 | 390  | 5955 | 761   | -    | NO | NO  | NO  |
| hsa-let-7f-1-3p  | 0.369686991 | -    | 2983 | 2032  | 2280 | NO | NO  | NO  |
| hsa-miR-126-5p   | 0.371262997 | -    | 2317 | 3656  | 2063 | NO | NO  | NO  |
| hsa-miR-590-5p   | 0.374002993 | 1769 | 4516 | -     | 5152 | NO | NO  | NO  |
| hsa-miR-877-5p   | 0.374339998 | 3103 | 4385 | 202   | -    | NO | NO  | YES |
| hsa-miR-607      | 0.375542015 | 1822 | 1746 | -     | 2198 | NO | NO  | NO  |
| hsa-miR-548h-5p  | 0.381455004 | 2989 | 4613 | -     | 1677 | NO | NO  | NO  |
| hsa-miR-500a-3p  | 0.387724012 | -    | 2322 | 2499  | 1246 | NO | NO  | NO  |
| hsa-miR-1323     | 0.388114005 | 3208 | 3929 | 4910  | 1951 | NO | NO  | NO  |
| hsa-miR-588      | 0.391874999 | 2090 | 3679 | -     | 962  | NO | NO  | NO  |
| hsa-miR-302f     | 0.402713001 | 890  | 4406 | 1523  | -    | NO | NO  | NO  |
| hsa-miR-889-3p   | 0.406574994 | 1708 | 5032 | 5249  | 943  | NO | NO  | NO  |

|                   |             |      |      |       |      |    |     |     |
|-------------------|-------------|------|------|-------|------|----|-----|-----|
| hsa-miR-155-5p    | 0.408793002 | 2540 | 1535 | -     | 2295 | NO | NO  | YES |
| hsa-miR-490-3p    | 0.413446009 | 632  | 4443 | 3129  | 2162 | NO | NO  | NO  |
| hsa-miR-101-5p    | 0.415030986 | -    | 1968 | 2411  | 1624 | NO | NO  | NO  |
| hsa-miR-145-3p    | 0.416088998 | -    | 2244 | 2089  | 1567 | NO | NO  | NO  |
| hsa-miR-526b-5p   | 0.420520008 | 211  | 3892 | -     | 2082 | NO | NO  | YES |
| hsa-miR-520d-5p   | 0.426066995 | 5323 | 6583 | 4838  | 4708 | NO | NO  | NO  |
| hsa-miR-1224-3p   | 0.436601013 | 2796 | 5367 | -     | 652  | NO | NO  | YES |
| hsa-miR-646       | 0.437252998 | 4135 | 3126 | 4823  | 2426 | NO | YES | NO  |
| hsa-miR-324-3p    | 0.441781998 | 1334 | 4519 | 3674  | -    | NO | NO  | YES |
| hsa-miR-148a-3p   | 0.444471002 | 3119 | 3369 | 5733  | 2488 | NO | NO  | YES |
| hsa-miR-760       | 0.444826007 | 2756 | 5572 | -     | 759  | NO | NO  | YES |
| hsa-miR-148b-3p   | 0.450354993 | 3208 | 3382 | 11119 | 2489 | NO | NO  | YES |
| hsa-miR-1179      | 0.451671004 | 3006 | 3343 | -     | 2315 | NO | NO  | NO  |
| hsa-miR-450b-5p   | 0.454584986 | 2039 | 5058 | 17036 | 3078 | NO | NO  | NO  |
| hsa-miR-548o-3p   | 0.458454013 | 3624 | 4236 | 4403  | 2191 | NO | NO  | NO  |
| hsa-miR-520c-3p   | 0.459800988 | 1945 | 5410 | 17257 | 2441 | NO | NO  | YES |
| hsa-miR-30a-3p    | 0.467294008 | -    | 5763 | 1463  | 3131 | NO | NO  | NO  |
| hsa-miR-634       | 0.467777014 | 3142 | 2964 | 16300 | 2294 | NO | NO  | YES |
| hsa-miR-302b-3p   | 0.471944004 | 2092 | 5542 | 11732 | 2380 | NO | NO  | NO  |
| hsa-miR-33a-3p    | 0.475270003 | -    | 1423 | 3436  | 3293 | NO | NO  | YES |
| hsa-miR-617       | 0.475704998 | 4147 | 2173 | 2583  | 1513 | NO | NO  | NO  |
| hsa-miR-541-3p    | 0.476085007 | 2284 | 3297 | 5274  | -    | NO | NO  | NO  |
| hsa-miR-338-3p    | 0.480908006 | 4369 | 2589 | 3671  | -    | NO | NO  | YES |
| hsa-miR-497-3p    | 0.484751999 | -    | 6703 | 1186  | 1920 | NO | NO  | NO  |
| hsa-miR-576-5p    | 0.488083005 | 1234 | 6065 | 4386  | 2300 | NO | NO  | NO  |
| hsa-miR-148b-5p   | 0.49287799  | -    | 4292 | 3172  | 1340 | NO | NO  | NO  |
| hsa-miR-221-5p    | 0.494044989 | -    | 6142 | 2691  | 1908 | NO | NO  | NO  |
| hsa-miR-125b-2-3p | 0.498228997 | -    | 3488 | 3246  | 2288 | NO | NO  | YES |
| hsa-miR-302e      | 0.499166995 | 2839 | 4983 | 17224 | 2339 | NO | NO  | YES |
| hsa-miR-520d-3p   | 0.501421988 | 2644 | 5409 | 17209 | 2386 | NO | NO  | NO  |
| hsa-miR-31-3p     | 0.502478004 | -    | 3169 | 1547  | 982  | NO | NO  | NO  |
| hsa-miR-302c-3p   | 0.504777014 | 2250 | 5530 | 8479  | 3361 | NO | NO  | YES |
| hsa-miR-30c-2-3p  | 0.507638991 | -    | 3313 | 5365  | 2787 | NO | NO  | YES |
| hsa-miR-875-3p    | 0.508500993 | 4825 | 4069 | 6307  | 3227 | NO | NO  | NO  |
| hsa-miR-520b      | 0.509263992 | 2695 | 5350 | 17259 | 2440 | NO | NO  | YES |
| hsa-miR-570-3p    | 0.51017803  | 4501 | 6058 | 5064  | 1660 | NO | NO  | NO  |
| hsa-miR-520e      | 0.516013026 | 2911 | 5323 | 17232 | 2344 | NO | NO  | YES |
| hsa-miR-302a-3p   | 0.516183972 | 2801 | 5520 | 17193 | 2374 | NO | NO  | NO  |
| hsa-miR-141-3p    | 0.521520972 | 2580 | 4029 | 4074  | 2439 | NO | NO  | YES |
| hsa-miR-373-3p    | 0.525241017 | 3495 | 5623 | 17268 | 1826 | NO | NO  | NO  |
| hsa-miR-330-5p    | 0.531329989 | 2070 | 3163 | 2788  | -    | NO | YES | NO  |
| hsa-miR-19b-3p    | 0.532522976 | 2579 | 4052 | 16127 | 2816 | NO | NO  | NO  |
| hsa-miR-27a-5p    | 0.535273015 | -    | 4714 | 2690  | 727  | NO | NO  | NO  |

|                  |             |      |      |       |      |     |     |     |
|------------------|-------------|------|------|-------|------|-----|-----|-----|
| hsa-miR-15b-5p   | 0.535530984 | 1111 | 7497 | 3124  | -    | NO  | NO  | NO  |
| hsa-miR-1238-3p  | 0.536861002 | 3817 | 3577 | 3359  | -    | NO  | NO  | YES |
| hsa-miR-3188     | 0.538332999 | -    | 329  | -     | 203  | NO  | NO  | NO  |
| hsa-miR-320d     | 0.540476024 | 3947 | 4301 | 7370  | 2597 | NO  | NO  | NO  |
| hsa-miR-623      | 0.547326028 | 4892 | 5111 | 4617  | 1305 | NO  | YES | NO  |
| hsa-miR-579-3p   | 0.550613999 | 5135 | 5436 | 4825  | 2104 | NO  | NO  | NO  |
| hsa-miR-7-5p     | 0.556505978 | 2324 | 5985 | 4568  | -    | NO  | NO  | NO  |
| hsa-miR-548s     | 0.556568027 | -    | 559  | -     | 311  | NO  | NO  | YES |
| hsa-miR-200a-3p  | 0.558322012 | 3138 | 3911 | 4332  | 2410 | NO  | NO  | YES |
| hsa-miR-1183     | 0.561589003 | 428  | 6402 | -     | 2500 | NO  | NO  | NO  |
| hsa-miR-638      | 0.564881027 | 2606 | 1011 | 4303  | -    | NO  | NO  | NO  |
| hsa-miR-320c     | 0.565195024 | 4293 | 4359 | 8102  | 2612 | NO  | NO  | NO  |
| hsa-miR-580-3p   | 0.568499029 | 4123 | 6351 | 4867  | 2139 | NO  | NO  | NO  |
| hsa-miR-130b-5p  | 0.569827974 | -    | 7487 | 185   | 2896 | YES | NO  | YES |
| hsa-miR-1202     | 0.571497977 | 3109 | 4406 | -     | 1886 | NO  | NO  | NO  |
| hsa-miR-26a-1-3p | 0.579515994 | -    | 509  | 7103  | 341  | NO  | NO  | NO  |
| hsa-miR-520a-3p  | 0.580022991 | 3834 | 5249 | 17230 | 2386 | NO  | NO  | NO  |
| hsa-miR-516b-5p  | 0.585080981 | 4649 | 5473 | -     | 2213 | NO  | NO  | NO  |
| hsa-miR-26a-2-3p | 0.585433006 | -    | 578  | 5461  | 344  | NO  | NO  | NO  |
| hsa-miR-221-3p   | 0.588545978 | 1219 | 4077 | 2946  | -    | NO  | YES | NO  |
| hsa-miR-324-5p   | 0.593029022 | 1814 | 4129 | 2383  | -    | NO  | NO  | NO  |
| hsa-miR-21-3p    | 0.593097985 | -    | 4656 | 2295  | 1488 | NO  | NO  | YES |
| hsa-miR-587      | 0.594022989 | 1082 | 6938 | -     | 3383 | NO  | NO  | YES |
| hsa-miR-641      | 0.59455198  | 2374 | 6243 | 2499  | -    | NO  | NO  | NO  |
| hsa-miR-34a-3p   | 0.59621799  | -    | 4804 | 2535  | 2065 | NO  | NO  | NO  |
| hsa-miR-519e-5p  | 0.600230992 | -    | 8100 | 2554  | 1689 | NO  | NO  | YES |
| hsa-miR-320a     | 0.601840973 | 4859 | 4447 | 13489 | 2606 | YES | NO  | YES |
| hsa-miR-320b     | 0.603555024 | 4884 | 4447 | 12623 | 2628 | NO  | NO  | YES |
| hsa-miR-508-3p   | 0.609637022 | 3233 | 3686 | 1766  | -    | NO  | NO  | YES |
| hsa-miR-888-3p   | 0.610174    | -    | 5065 | 2019  | 951  | NO  | NO  | YES |
| hsa-miR-372-3p   | 0.618840992 | 4274 | 5381 | 17131 | 2464 | NO  | NO  | NO  |
| hsa-miR-562      | 0.626774013 | 3219 | 5552 | 3387  | 2135 | NO  | NO  | NO  |
| hsa-miR-29a-5p   | 0.633677006 | -    | 6454 | 355   | 2942 | NO  | NO  | NO  |
| hsa-miR-302b-5p  | 0.636159003 | -    | 6918 | 3007  | 2028 | NO  | NO  | NO  |
| hsa-miR-149-5p   | 0.637017012 | 2416 | 6435 | 3973  | -    | NO  | YES | NO  |
| hsa-miR-1285-3p  | 0.638437986 | 3260 | 7417 | 4019  | -    | NO  | NO  | NO  |
| hsa-miR-532-5p   | 0.64130199  | 1129 | 779  | 16961 | -    | NO  | NO  | YES |
| hsa-miR-1257     | 0.641606987 | 3175 | 3828 | 3298  | -    | NO  | NO  | NO  |
| hsa-miR-19a-3p   | 0.64240402  | 3678 | 4171 | -     | 2814 | NO  | NO  | NO  |
| hsa-miR-204-5p   | 0.644636989 | 5090 | 5540 | 4723  | 2313 | NO  | NO  | YES |
| hsa-miR-1297     | 0.644662976 | 4967 | 3064 | 3781  | -    | NO  | NO  | NO  |
| hsa-miR-22-5p    | 0.647931993 | -    | 5221 | 2671  | 2670 | NO  | NO  | NO  |
| hsa-miR-612      | 0.648656011 | 2362 | 7732 | 3988  | -    | NO  | YES | NO  |



|                  |             |      |      |       |      |    |     |     |
|------------------|-------------|------|------|-------|------|----|-----|-----|
| hsa-miR-130a-5p  | 0.651410997 | -    | 4723 | 3506  | 3320 | NO | YES | NO  |
| hsa-miR-370-3p   | 0.652806997 | 5342 | 5008 | 11266 | 2605 | NO | NO  | NO  |
| hsa-miR-125a-5p  | 0.65437901  | 3236 | 4700 | 3427  | -    | NO | NO  | NO  |
| hsa-miR-1207-5p  | 0.659171999 | 5043 | 4194 | 6741  | -    | NO | NO  | YES |
| hsa-miR-885-3p   | 0.666885972 | 3455 | 5601 | -     | 2139 | NO | NO  | YES |
| hsa-miR-1298-5p  | 0.669445992 | 1290 | 5528 | 2854  | -    | NO | NO  | NO  |
| hsa-miR-922      | 0.678541005 | 1961 | 7165 | 4562  | -    | NO | NO  | NO  |
| hsa-miR-106b-3p  | 0.678686976 | -    | 528  | 1359  | 223  | NO | NO  | YES |
| hsa-miR-671-5p   | 0.680431008 | 2667 | 3705 | 5015  | -    | NO | NO  | YES |
| hsa-miR-25-3p    | 0.690807998 | 4065 | 5423 | 1741  | -    | NO | NO  | NO  |
| hsa-miR-302a-5p  | 0.691338003 | -    | 1058 | 7211  | 1807 | NO | NO  | NO  |
| hsa-miR-21-5p    | 0.692276001 | 944  | 1236 | 16804 | -    | NO | NO  | NO  |
| hsa-miR-214-3p   | 0.692282021 | 1318 | 2282 | 11561 | -    | NO | NO  | NO  |
| hsa-miR-1248     | 0.693575978 | 3458 | 7863 | 4089  | 3196 | NO | NO  | NO  |
| hsa-miR-302d-5p  | 0.695556998 | -    | 6936 | 2389  | 1925 | NO | NO  | NO  |
| hsa-miR-493-5p   | 0.699221015 | -    | 5294 | 3265  | 2776 | NO | NO  | YES |
| hsa-miR-513c-5p  | 0.703764021 | 5711 | 6003 | 4838  | 2356 | NO | NO  | YES |
| hsa-miR-382-5p   | 0.705784023 | 2052 | 888  | 16914 | -    | NO | NO  | YES |
| hsa-miR-1253     | 0.706465006 | 5599 | 6826 | 3773  | -    | NO | NO  | NO  |
| hsa-miR-939-5p   | 0.710116982 | 5894 | 5089 | -     | 3147 | NO | YES | NO  |
| hsa-miR-1258     | 0.713051975 | 5442 | 3785 | 2844  | 1329 | NO | NO  | NO  |
| hsa-miR-384      | 0.724189997 | 479  | 2762 | 3468  | -    | NO | NO  | NO  |
| hsa-miR-124-5p   | 0.725263    | -    | 4952 | 2585  | 1964 | NO | NO  | YES |
| hsa-miR-92a-3p   | 0.725795984 | 4064 | 5345 | 2394  | -    | NO | YES | NO  |
| hsa-miR-127-5p   | 0.729249001 | 3415 | 5740 | 3740  | -    | NO | NO  | YES |
| hsa-miR-488-5p   | 0.736375988 | -    | 1312 | 16999 | 1674 | NO | NO  | NO  |
| hsa-miR-373-5p   | 0.737739027 | -    | 2605 | 5009  | 1822 | NO | NO  | YES |
| hsa-miR-1231     | 0.744714975 | 5415 | 6332 | 2176  | -    | NO | NO  | YES |
| hsa-miR-551b-5p  | 0.761790991 | -    | 3510 | 4643  | 1115 | NO | NO  | NO  |
| hsa-miR-548l     | 0.767163992 | 5031 | 7765 | 5295  | 2610 | NO | NO  | NO  |
| hsa-miR-138-1-3p | 0.770226002 | -    | 2114 | 2598  | 873  | NO | NO  | NO  |
| hsa-miR-629-3p   | 0.770277977 | -    | 7994 | 4613  | 2734 | NO | NO  | YES |
| hsa-miR-548e-3p  | 0.77226001  | 2928 | 7418 | -     | 3440 | NO | NO  | YES |
| hsa-miR-335-3p   | 0.774380982 | -    | 3820 | 6865  | 1583 | NO | NO  | NO  |
| hsa-miR-185-3p   | 0.775705993 | -    | 2126 | 11902 | 1782 | NO | YES | NO  |
| hsa-miR-654-5p   | 0.778514981 | 1954 | 3171 | 7598  | -    | NO | NO  | NO  |
| hsa-miR-544a     | 0.783111989 | 6393 | 6774 | 3211  | -    | NO | NO  | NO  |
| hsa-miR-34c-5p   | 0.791676998 | 3942 | 790  | 6053  | -    | NO | NO  | NO  |
| hsa-miR-411-3p   | 0.792636991 | -    | 2540 | 2691  | 1147 | NO | NO  | NO  |
| hsa-miR-619-3p   | 0.794385016 | 2190 | 2263 | 8814  | -    | NO | NO  | NO  |
| hsa-miR-518e-3p  | 0.796905994 | 1576 | 340  | 16814 | -    | NO | NO  | NO  |
| hsa-miR-573      | 0.800228    | 5307 | 5834 | 3939  | -    | NO | NO  | NO  |
| hsa-miR-379-3p   | 0.800768018 | -    | 2708 | 2999  | 1151 | NO | NO  | NO  |

|                  |             |      |      |       |      |    |     |     |
|------------------|-------------|------|------|-------|------|----|-----|-----|
| hsa-miR-133a-3p  | 0.800979018 | 126  | 4156 | 4377  | -    | NO | NO  | YES |
| hsa-miR-34a-5p   | 0.801451981 | 4243 | 727  | 6563  | -    | NO | NO  | NO  |
| hsa-miR-337-3p   | 0.809539974 | 398  | 3417 | 16491 | -    | NO | NO  | YES |
| hsa-miR-576-3p   | 0.818086982 | 4104 | 792  | 2907  | -    | NO | NO  | NO  |
| hsa-miR-33b-5p   | 0.818750024 | 3717 | 1143 | 6535  | -    | NO | NO  | YES |
| hsa-miR-133b     | 0.822797    | 246  | 4156 | 4703  | -    | NO | NO  | YES |
| hsa-miR-1295a    | 0.824312985 | 208  | 2507 | 15073 | -    | NO | NO  | YES |
| hsa-miR-888-5p   | 0.825070977 | 3715 | 946  | 15575 | -    | NO | NO  | NO  |
| hsa-miR-34b-3p   | 0.831609011 | 1915 | 2629 | 6150  | -    | NO | NO  | YES |
| hsa-miR-30b-3p   | 0.832422018 | -    | 7707 | 5742  | 4874 | NO | NO  | NO  |
| hsa-miR-1263     | 0.834183991 | 1598 | 1758 | -     | -    | NO | NO  | NO  |
| hsa-miR-1279     | 0.841153026 | 651  | 4644 | 3104  | -    | NO | NO  | NO  |
| hsa-miR-10b-5p   | 0.842842996 | 4022 | 6407 | -     | 2452 | NO | NO  | NO  |
| hsa-miR-627-5p   | 0.843616009 | 1006 | 4017 | 4298  | -    | NO | NO  | YES |
| hsa-miR-1283     | 0.843748987 | 915  | 4521 | 3582  | -    | NO | NO  | NO  |
| hsa-miR-10a-5p   | 0.845750988 | 4105 | 6470 | -     | 2457 | NO | NO  | YES |
| hsa-miR-1225-3p  | 0.848917007 | 4491 | 5508 | -     | 2502 | NO | YES | NO  |
| hsa-miR-508-5p   | 0.849784017 | 1886 | 4517 | 5370  | -    | NO | NO  | YES |
| hsa-miR-331-5p   | 0.852726996 | 1017 | 3446 | 3902  | -    | NO | NO  | YES |
| hsa-miR-507      | 0.853317976 | 4517 | 1648 | 13071 | -    | NO | NO  | YES |
| hsa-miR-630      | 0.862909973 | 1643 | 3354 | 8094  | -    | NO | NO  | YES |
| hsa-miR-548n     | 0.863903999 | 604  | 6180 | 6049  | -    | NO | NO  | NO  |
| hsa-miR-708-5p   | 0.865096986 | 4390 | 2146 | 9528  | -    | NO | NO  | YES |
| hsa-miR-519c-3p  | 0.86897099  | 3457 | 3008 | 15230 | -    | NO | NO  | YES |
| hsa-miR-543      | 0.870742977 | 1652 | 5169 | 4572  | -    | NO | NO  | YES |
| hsa-miR-26b-5p   | 0.874917984 | 3015 | 3537 | 4321  | -    | NO | NO  | NO  |
| hsa-miR-1224-5p  | 0.875396013 | 3432 | 3677 | 4471  | -    | NO | NO  | YES |
| hsa-miR-363-5p   | 0.877811015 | -    | 3652 | 10735 | 2959 | NO | NO  | YES |
| hsa-miR-302c-5p  | 0.878795981 | -    | 4055 | 4211  | 2021 | NO | NO  | YES |
| hsa-miR-129-2-3p | 0.879392982 | 3998 | 2211 | 3677  | -    | NO | NO  | NO  |
| hsa-miR-935      | 0.881386995 | 2289 | 3793 | 4024  | -    | NO | YES | NO  |
| hsa-miR-153-3p   | 0.887670994 | 1185 | 4557 | 4318  | -    | NO | NO  | YES |
| hsa-miR-323a-3p  | 0.892503977 | 5040 | 1142 | 7143  | -    | NO | NO  | NO  |
| hsa-miR-642a-5p  | 0.893747985 | 3784 | 3372 | 12311 | -    | NO | NO  | NO  |
| hsa-miR-411-5p   | 0.895319998 | 722  | 5829 | 2311  | -    | NO | NO  | NO  |
| hsa-miR-1269a    | 0.896767974 | 1977 | 2606 | 6137  | -    | NO | NO  | YES |
| hsa-miR-632      | 0.898676991 | 873  | 6370 | 5085  | -    | NO | NO  | NO  |
| hsa-miR-323a-5p  | 0.898778975 | 1297 | 5597 | 5851  | -    | NO | YES | NO  |
| hsa-miR-331-3p   | 0.898838997 | 3058 | 3659 | 5215  | -    | NO | NO  | NO  |
| hsa-miR-647      | 0.900600016 | 909  | 6809 | 5550  | -    | NO | NO  | NO  |
| hsa-miR-216a-5p  | 0.901630998 | 2436 | 4586 | 5325  | -    | NO | NO  | NO  |
| hsa-miR-181c-5p  | 0.902131975 | 4412 | 2955 | 8892  | -    | NO | NO  | YES |
| hsa-miR-631      | 0.90417999  | 985  | 4867 | 6056  | -    | NO | NO  | NO  |

|                 |             |      |      |       |      |    |     |     |
|-----------------|-------------|------|------|-------|------|----|-----|-----|
| hsa-miR-326     | 0.904811025 | 1492 | 3046 | 5312  | -    | NO | YES | NO  |
| hsa-miR-125b-5p | 0.910080016 | 2593 | 4633 | 16395 | -    | NO | NO  | YES |
| hsa-miR-215-5p  | 0.910381973 | 1372 | 5046 | 5735  | -    | NO | NO  | NO  |
| hsa-miR-875-5p  | 0.910911024 | 862  | 4105 | 2269  | -    | NO | NO  | NO  |
| hsa-miR-22-3p   | 0.911913991 | 850  | 5743 | 3756  | -    | NO | NO  | NO  |
| hsa-miR-16-5p   | 0.913622022 | 1337 | 7522 | 5233  | -    | NO | NO  | YES |
| hsa-miR-513a-3p | 0.914426029 | 274  | 8689 | 5064  | -    | NO | NO  | NO  |
| hsa-miR-193a-3p | 0.916751027 | 1666 | 4326 | 4192  | -    | NO | NO  | NO  |
| hsa-miR-28-5p   | 0.917303979 | 6183 | 2034 | 8069  | -    | NO | NO  | NO  |
| hsa-miR-26a-5p  | 0.917753994 | 4514 | 3391 | 4148  | -    | NO | NO  | NO  |
| hsa-miR-577     | 0.921604991 | 1790 | 6340 | 4555  | -    | NO | NO  | NO  |
| hsa-let-7g-3p   | 0.922379017 | -    | 4929 | 3689  | 2051 | NO | YES | NO  |
| hsa-miR-219a-5p | 0.926090002 | 2264 | 3160 | 15769 | -    | NO | NO  | NO  |
| hsa-miR-664a-3p | 0.926340997 | 1573 | 6886 | 8538  | -    | NO | NO  | NO  |
| hsa-miR-501-3p  | 0.928975999 | 1116 | 2074 | 2673  | -    | NO | NO  | NO  |
| hsa-miR-192-5p  | 0.929176986 | 2034 | 5046 | 4916  | -    | NO | NO  | NO  |
| hsa-miR-649     | 0.930019021 | 1370 | 5440 | 3132  | -    | NO | NO  | NO  |
| hsa-miR-616-5p  | 0.930212021 | -    | 5867 | 4718  | 2138 | NO | NO  | YES |
| hsa-miR-380-3p  | 0.930253983 | 1471 | 6307 | 3701  | -    | NO | NO  | NO  |
| hsa-miR-140-3p  | 0.932790995 | 2918 | 5917 | 3634  | -    | NO | NO  | NO  |
| hsa-miR-92b-3p  | 0.933541    | 2319 | 5293 | 3282  | -    | NO | NO  | NO  |
| hsa-miR-342-3p  | 0.935725987 | 2244 | 6339 | 3830  | -    | NO | NO  | NO  |
| hsa-miR-890     | 0.93699801  | 2322 | 6290 | 6434  | -    | NO | NO  | NO  |
| hsa-miR-497-5p  | 0.940972984 | 2660 | 7459 | 16313 | -    | NO | NO  | YES |
| hsa-miR-1225-5p | 0.941091001 | 4495 | 2485 | 5280  | -    | NO | NO  | NO  |
| hsa-miR-520f-3p | 0.945172012 | 2273 | 4554 | 7070  | -    | NO | NO  | YES |
| hsa-miR-93-3p   | 0.945330024 | -    | 6734 | 13971 | 3137 | NO | NO  | YES |
| hsa-miR-502-3p  | 0.945379972 | 1640 | 2247 | 4217  | -    | NO | NO  | NO  |
| hsa-miR-363-3p  | 0.945716977 | 2600 | 5386 | 3285  | -    | NO | NO  | NO  |
| hsa-miR-30a-5p  | 0.947404027 | 2451 | 5799 | 16478 | -    | NO | NO  | NO  |
| hsa-miR-519b-3p | 0.948282003 | 2938 | 6539 | 17068 | -    | NO | NO  | NO  |
| hsa-miR-339-5p  | 0.952144027 | 3428 | 5991 | 10461 | -    | NO | NO  | YES |
| hsa-miR-30b-5p  | 0.954083979 | 2759 | 5797 | 6113  | -    | NO | NO  | NO  |
| hsa-miR-1322    | 0.955558002 | 3585 | 3436 | 3280  | -    | NO | NO  | YES |
| hsa-miR-425-5p  | 0.95590198  | 4549 | 4032 | 16526 | -    | NO | NO  | NO  |
| hsa-miR-15a-5p  | 0.956933975 | 3500 | 7523 | 8657  | -    | NO | NO  | NO  |
| hsa-miR-340-5p  | 0.961197019 | 3603 | 6675 | 4761  | -    | NO | NO  | NO  |
| hsa-miR-375     | 0.961601973 | 2933 | 4887 | 7818  | -    | NO | NO  | YES |
| hsa-miR-502-5p  | 0.961920023 | 5290 | 5274 | 9461  | -    | NO | NO  | YES |
| hsa-miR-16-2-3p | 0.962795019 | -    | 6152 | 3564  | 2660 | NO | NO  | NO  |
| hsa-miR-452-5p  | 0.965198994 | 4512 | 5641 | 3608  | -    | NO | NO  | NO  |
| hsa-miR-30d-5p  | 0.965260983 | 3464 | 5697 | 15529 | -    | NO | NO  | NO  |
| hsa-miR-1254    | 0.966180027 | 5711 | 7156 | 16777 | -    | NO | NO  | NO  |

|                 |             |      |      |       |   |    |     |     |
|-----------------|-------------|------|------|-------|---|----|-----|-----|
| hsa-miR-30e-5p  | 0.967535973 | 3590 | 5897 | 15903 | - | NO | NO  | NO  |
| hsa-miR-30c-5p  | 0.968336999 | 3606 | 5821 | 14819 | - | NO | NO  | NO  |
| hsa-miR-32-5p   | 0.971656978 | 4045 | 5533 | 3312  | - | NO | NO  | NO  |
| hsa-miR-514a-3p | 0.974066973 | 4240 | 4996 | 14145 | - | NO | NO  | NO  |
| hsa-miR-622     | 0.977292001 | 5132 | 6845 | 4811  | - | NO | NO  | NO  |
| hsa-miR-1200    | 0.977927029 | 5278 | 7463 | 16907 | - | NO | NO  | NO  |
| hsa-miR-512-5p  | 0.979613006 | 4728 | 4104 | 16622 | - | NO | NO  | YES |
| hsa-miR-557     | 0.980004013 | 5334 | 6952 | 5192  | - | NO | NO  | NO  |
| hsa-miR-205-5p  | 0.980677009 | 4651 | 7236 | 4749  | - | NO | NO  | NO  |
| hsa-miR-876-3p  | 0.980974972 | 5899 | 5759 | 6960  | - | NO | NO  | NO  |
| hsa-miR-367-3p  | 0.98160398  | 4987 | 5453 | 3376  | - | NO | NO  | NO  |
| hsa-miR-668-3p  | 0.983757019 | 5025 | 5535 | 16622 | - | NO | YES | NO  |
| hsa-miR-1207-3p | 0.984812021 | 4800 | 8654 | 2873  | - | NO | NO  | YES |
| hsa-miR-575     | 0.985710025 | 5777 | 8007 | 11921 | - | NO | YES | NO  |
| hsa-miR-499a-3p | 0.987583995 | 3632 | 4144 | 8926  | - | NO | NO  | NO  |
