# Supplementary material for: miR-514a-3p: a novel SHP-2 regulatory miRNA that modulates human cytotrophoblast proliferation
Source: PubMed Central journal article supplement (PMC8789026; doi:10.1530/jme-21-0175), 2021-11-18
Supplement: supplementary_table_3.pdf [file supplementary_table_3.pdf]

| miRNA                  | Fold change in PTPN11 expression (relative to 18SrNA) | Predicted to target <i>PTPN11</i> | Key                                       |
|------------------------|-------------------------------------------------------|-----------------------------------|-------------------------------------------|
| hsa-miR-574-5p         | 1.64                                                  | NO                                | Increased >2 fold                         |
| hsa-miR-184            | 1.28                                                  | NO                                | Decreased >2fold                          |
| <b>hsa-miR-660</b>     | <b>1.17</b>                                           | <b>YES</b>                        | <b>Predicted to target PTPN11 in bold</b> |
| <b>hsa-miR-337-5p</b>  | <b>1</b>                                              | <b>YES</b>                        |                                           |
| <b>hsa-miR-146b-5p</b> | <b>1.36</b>                                           | <b>YES</b>                        |                                           |
| hsa-miR-432            | 1.31                                                  | NO                                |                                           |
| <b>hsa-miR-370</b>     | <b>1.23</b>                                           | <b>YES</b>                        |                                           |
| <b>hsa-miR-95-3p</b>   | <b>-1.08</b>                                          | <b>YES</b>                        |                                           |
| hsa-miR-206            | 1.27                                                  | NO                                |                                           |
| <b>hsa-miR-873-5p</b>  | <b>1.26</b>                                           | <b>YES</b>                        |                                           |
| hsa-miR-532-3p         | -1.01                                                 | NO                                |                                           |
| hsa-miR-139-3p         | 1.76                                                  | NO                                |                                           |
| <b>hsa-miR-524-5p</b>  | <b>1.07</b>                                           | <b>YES</b>                        |                                           |
| <b>hsa-miR-188-3p</b>  | <b>-1.01</b>                                          | <b>YES</b>                        |                                           |
| <b>hsa-miR-590-5p</b>  | <b>1.08</b>                                           | <b>YES</b>                        |                                           |
| <b>hsa-miR-455-5p</b>  | <b>1.06</b>                                           | <b>YES</b>                        |                                           |
| <b>hsa-miR-331-5p</b>  | <b>-1.1</b>                                           | <b>YES</b>                        |                                           |
| <b>hsa-miR-429</b>     | <b>-1.25</b>                                          | <b>YES</b>                        |                                           |
| <b>hsa-miR-362-5p</b>  | <b>1.54</b>                                           | <b>YES</b>                        |                                           |
| hsa-miR-525-3p         | 1.26                                                  | NO                                |                                           |
| <b>hsa-miR-493</b>     | <b>1.09</b>                                           | <b>YES</b>                        |                                           |
| <b>hsa-miR-526b</b>    | <b>-1.24</b>                                          | <b>YES</b>                        |                                           |
| hsa-miR-190            | 1.27                                                  | NO                                |                                           |
| <b>hsa-miR-515-5p</b>  | <b>1.77</b>                                           | <b>YES</b>                        |                                           |
| hsa-miR-665            | 1.23                                                  | NO                                |                                           |
| hsa-miR-147a           | -1.42                                                 | NO                                |                                           |
| <b>hsa-miR-361-3p</b>  | <b>-1.06</b>                                          | <b>YES</b>                        |                                           |
| <b>hsa-miR-514</b>     | <b>-3.4</b>                                           | <b>YES</b>                        |                                           |
| <b>hsa-miR-376b</b>    | <b>-1.25</b>                                          | <b>YES</b>                        |                                           |
| <b>hsa-miR-582-5p</b>  | <b>1.45</b>                                           | <b>YES</b>                        |                                           |
| <b>hsa-miR-187-3p</b>  | <b>1.11</b>                                           | <b>YES</b>                        |                                           |
| <b>hsa-miR-671-5p</b>  | <b>1.1</b>                                            | <b>YES</b>                        |                                           |
| hsa-miR-487b           | -1.12                                                 | NO                                |                                           |
| <b>hsa-miR-651</b>     | <b>-1.06</b>                                          | <b>YES</b>                        |                                           |
| <b>hsa-miR-219a-5p</b> | <b>1.28</b>                                           | <b>YES</b>                        |                                           |
| hsa-miR-299-3p         | -1.03                                                 | NO                                |                                           |
| hsa-miR-449a           | 1.23                                                  | NO                                |                                           |
| <b>hsa-miR-369-3p</b>  | <b>1.16</b>                                           | <b>YES</b>                        |                                           |
| hsa-miR-219-2-3p       | 1.28                                                  | NO                                |                                           |
| <b>hsa-miR-105-5p</b>  | <b>-1.07</b>                                          | <b>YES</b>                        |                                           |

|                        |              |            |
|------------------------|--------------|------------|
| hsa-miR-551b-3p        | -1.12        | NO         |
| hsa-miR-542-5p         | 1.14         | NO         |
| <b>hsa-miR-542-3p</b>  | <b>1.24</b>  | <b>YES</b> |
| <b>hsa-miR-618</b>     | <b>-1.35</b> | <b>YES</b> |
| <b>hsa-miR-502-3p</b>  | <b>-1.08</b> | <b>YES</b> |
| hsa-miR-519a-3p        | -1.14        | NO         |
| hsa-miR-181d           | 1.15         | NO         |
| <b>hsa-miR-382-5p</b>  | <b>1.33</b>  | <b>YES</b> |
| <b>hsa-miR-508-3p</b>  | <b>1.28</b>  | <b>YES</b> |
| hsa-miR-450a           | 1.08         | NO         |
| <b>hsa-miR-127-5p</b>  | <b>1.07</b>  | <b>YES</b> |
| hsa-miR-523            | 1.1          | NO         |
| <b>hsa-miR-589</b>     | <b>1.87</b>  | <b>YES</b> |
| hsa-miR-369-5p         | 1.29         | NO         |
| hsa-miR-615-3p         | 1.17         | NO         |
| <b>hsa-miR-518a-5p</b> | <b>-1.19</b> | <b>YES</b> |
| <b>hsa-miR-576-3p</b>  | <b>1.12</b>  | <b>YES</b> |
| <b>hsa-miR-337-3p</b>  | <b>1.06</b>  | <b>YES</b> |
| <b>hsa-miR-362-3p</b>  | <b>1.07</b>  | <b>YES</b> |
| hsa-miR-515-3p         | 1.53         | NO         |
| hsa-miR-518a-3p        | 1.32         | NO         |
| <b>hsa-miR-885-5p</b>  | <b>1.86</b>  | <b>YES</b> |
| hsa-miR-433            | 1.3          | NO         |
| <b>hsa-miR-512-3p</b>  | <b>1.58</b>  | <b>YES</b> |
| <b>hsa-miR-548d-5p</b> | <b>1.59</b>  | <b>YES</b> |
| <b>hsa-miR-133b</b>    | <b>1.74</b>  | <b>YES</b> |
| hsa-miR-296-5p         | 1.13         | NO         |
| hsa-miR-371a-3p        | -1.15        | NO         |
| <b>hsa-miR-330-3p</b>  | <b>-1.31</b> | <b>YES</b> |
| <b>hsa-miR-329</b>     | <b>-1.44</b> | <b>YES</b> |
| <b>hsa-miR-495-3p</b>  | <b>1.19</b>  | <b>YES</b> |
| <b>hsa-miR-450b-5p</b> | <b>1.46</b>  | <b>YES</b> |
| <b>hsa-miR-758-3p</b>  | <b>2.16</b>  | <b>YES</b> |
| <b>hsa-miR-522-3p</b>  | <b>-1.04</b> | <b>YES</b> |
| <b>hsa-miR-323a-3p</b> | <b>1.3</b>   | <b>YES</b> |
| <b>hsa-miR-889</b>     | <b>1.25</b>  | <b>YES</b> |
| <b>hsa-miR-208b</b>    | <b>1.11</b>  | <b>YES</b> |
| hsa-miR-487a           | -1.06        | NO         |
| hsa-miR-628-3p         | -1.12        | NO         |
| <b>hsa-miR-628-5p</b>  | <b>-1.12</b> | <b>YES</b> |
| hsa-miR-671-3p         | 1.45         | NO         |
| hsa-miR-485-3p         | -1.15        | NO         |
| <b>hsa-miR-548d-3p</b> | <b>1.29</b>  | <b>YES</b> |

|                        |              |            |
|------------------------|--------------|------------|
| <b>hsa-miR-383</b>     | <b>1.62</b>  | <b>YES</b> |
| <b>hsa-miR-548b-3p</b> | <b>1.07</b>  | <b>YES</b> |
| <b>hsa-miR-548n</b>    | <b>1.27</b>  | <b>YES</b> |
| <b>hsa-miR-573</b>     | <b>-1.14</b> | <b>YES</b> |
| <b>hsa-miR-587</b>     | <b>-1.01</b> | <b>YES</b> |
| <b>hsa-miR-621</b>     | <b>-1.39</b> | <b>YES</b> |
| <b>hsa-miR-629-5p</b>  | <b>-1.39</b> | <b>NO</b>  |
